# Supplementary figures and images for: Diversity and Composition of Rumen Bacteria, Fungi, and Protozoa in Goats and Sheep Living in the Same High-Altitude Pasture
Source: MDPI journal article supplement (doi:10.3390/ani10020186), 2020-01-22

Bacteria

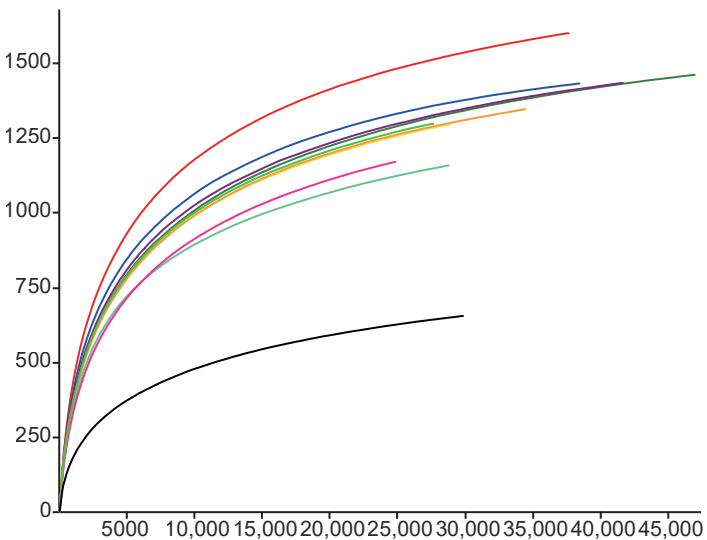

Fungi

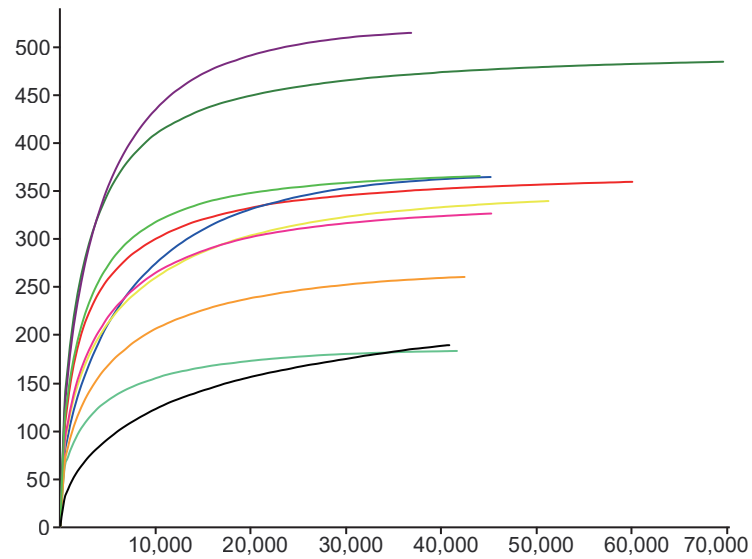

Protozoa

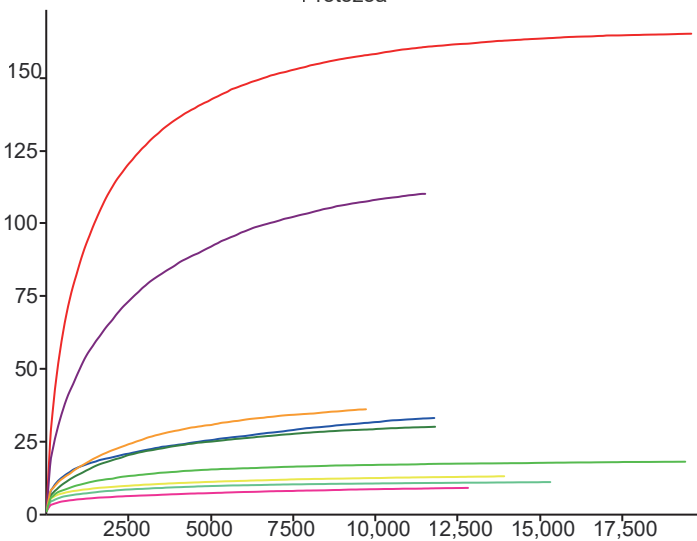

- Goats\_1
- Goats\_2
- Goats\_3
- Goats\_4
- Goats\_5
- Sheep\_1
- Sheep\_2
- Sheep\_3
- Sheep\_4
- Sheep\_5

Supplement: s1 [file s1]
